# Supplementary material
Source: PubMed Central journal article supplement (PMC11488017)
Supplement: media-1.pdf [file media-1.pdf]

Supplementary information

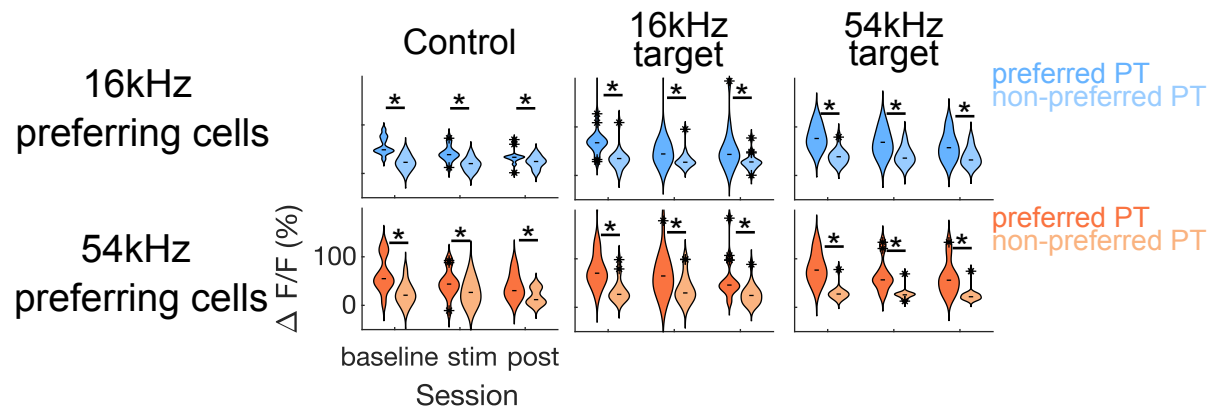

**Supplementary Figure 1. Subgrouped non-target cells show the frequency preference.** Violin plots for average response amplitudes of either 16 kHz preferring cells (blue) or 54 kHz preferring cells (orange) to each frequency for each session and for each condition (either 16kHz 5-cell stimulation, 54kHz 5-cell stimulation, or control with no stimulation at each column). Both groups of cells show greater responses to their preferred frequency (darker shades) regardless of the session (Asterisks above the horizontal line; Mixed-effect model,  $p < 0.0001$  for frequency, all  $p > 0.05$  across sessions and conditions). Asterisks on the violinplot indicate outlier cells and horizontal lines on the the violinplot indicate medians.
